# Supplementary figures and images for: Tannic acid adjusts Pd dispersity over Al2O3 for acetylene selective hydrogenation
Source: Royal Society of Chemistry journal article supplement (doi:10.1039/d4nj01539h), 2024-01-01

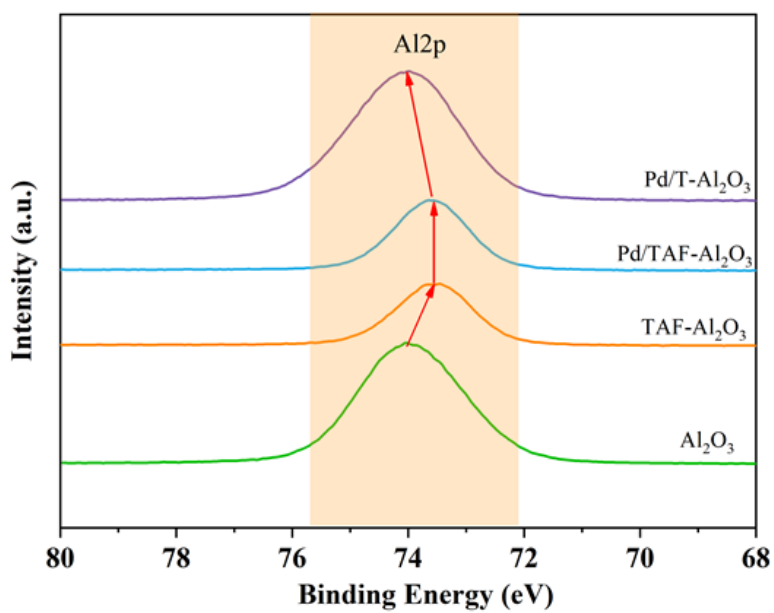

Fig. S1 XPS of different samples with Al

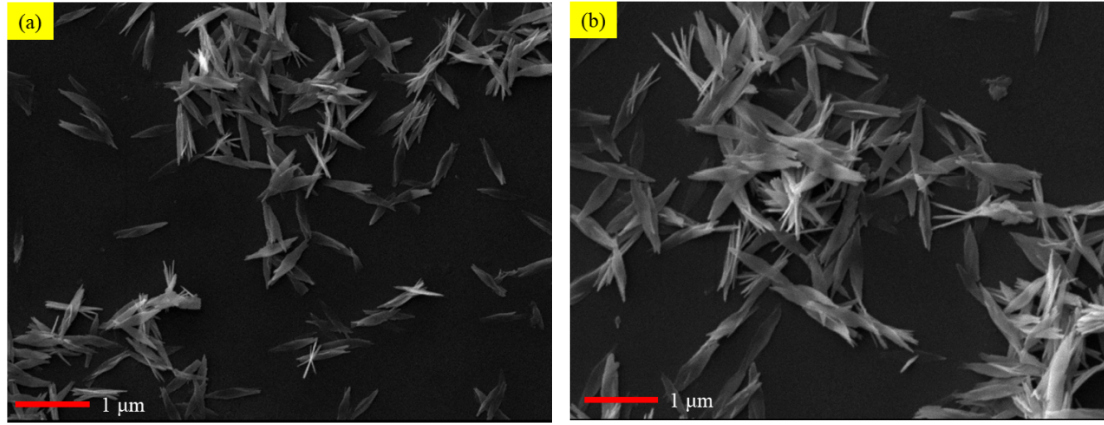

**Fig. S2** SEM of  $\text{Al}_2\text{O}_3$  (a) and TAF- $\text{Al}_2\text{O}_3$  (b)

Supplement: d4nj01539h1.pdf [file d4nj01539h1.pdf]
